# Supplementary material
Source: Springer Nature journal article supplement (https://www.springermedizin.de/resource/supplementary/12936_2013_3094_MOESM2_ESM.pdf/9545824)

**A. Azithromycin**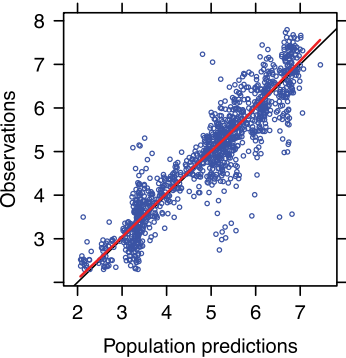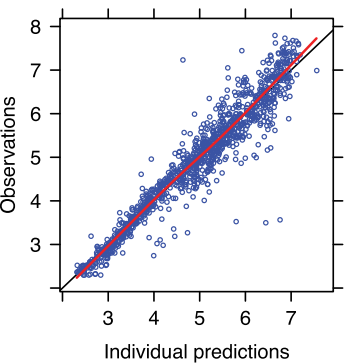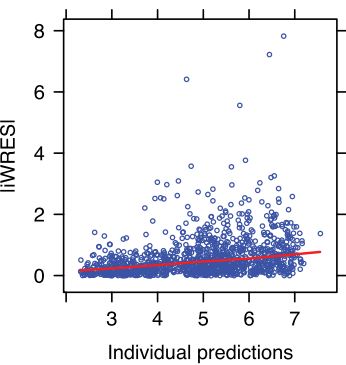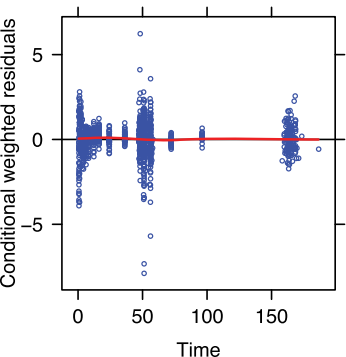**B. Chloroquine**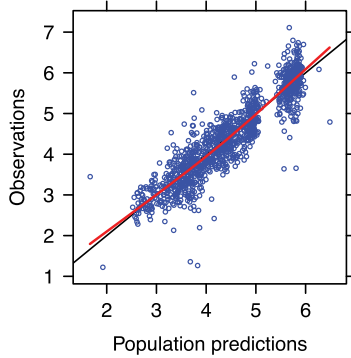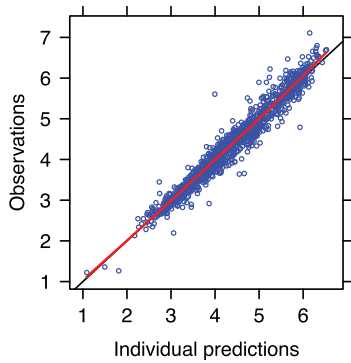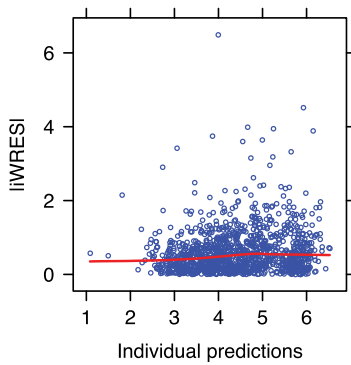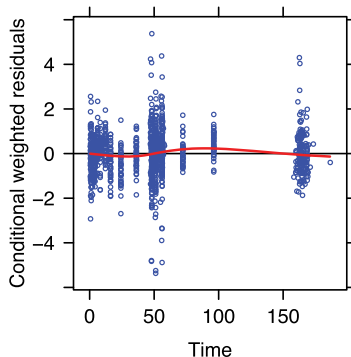

Supplement: MOESM2 [file 9545824]
